# Supplementary material for: Succinylation Regulators Promote Clear Cell Renal Cell Carcinoma by Immune Regulation and RNA N6-Methyladenosine Methylation
Source: PubMed Central journal article supplement (PMC7935513; doi:10.3389/fcell.2021.622198), 2021-02-18
Supplement: Data_Sheet_1.pdf [file Data_Sheet_1.pdf]

## Supplementary Material

### Supplementary Figures

**FIGURE S1** | The flowchart of the whole study. ★ Labelled parts were analyzed by dataset 1 and validated by dataset 2. KIRC, kidney renal clear cell carcinoma; ccRCC, clear cell renal cell carcinoma; TCGA, The Cancer Genome Atlas; DEGs, differently expressed genes; LASSO, least absolute shrinkage and selection operator; LASSO, least absolute shrinkage and selection operator.

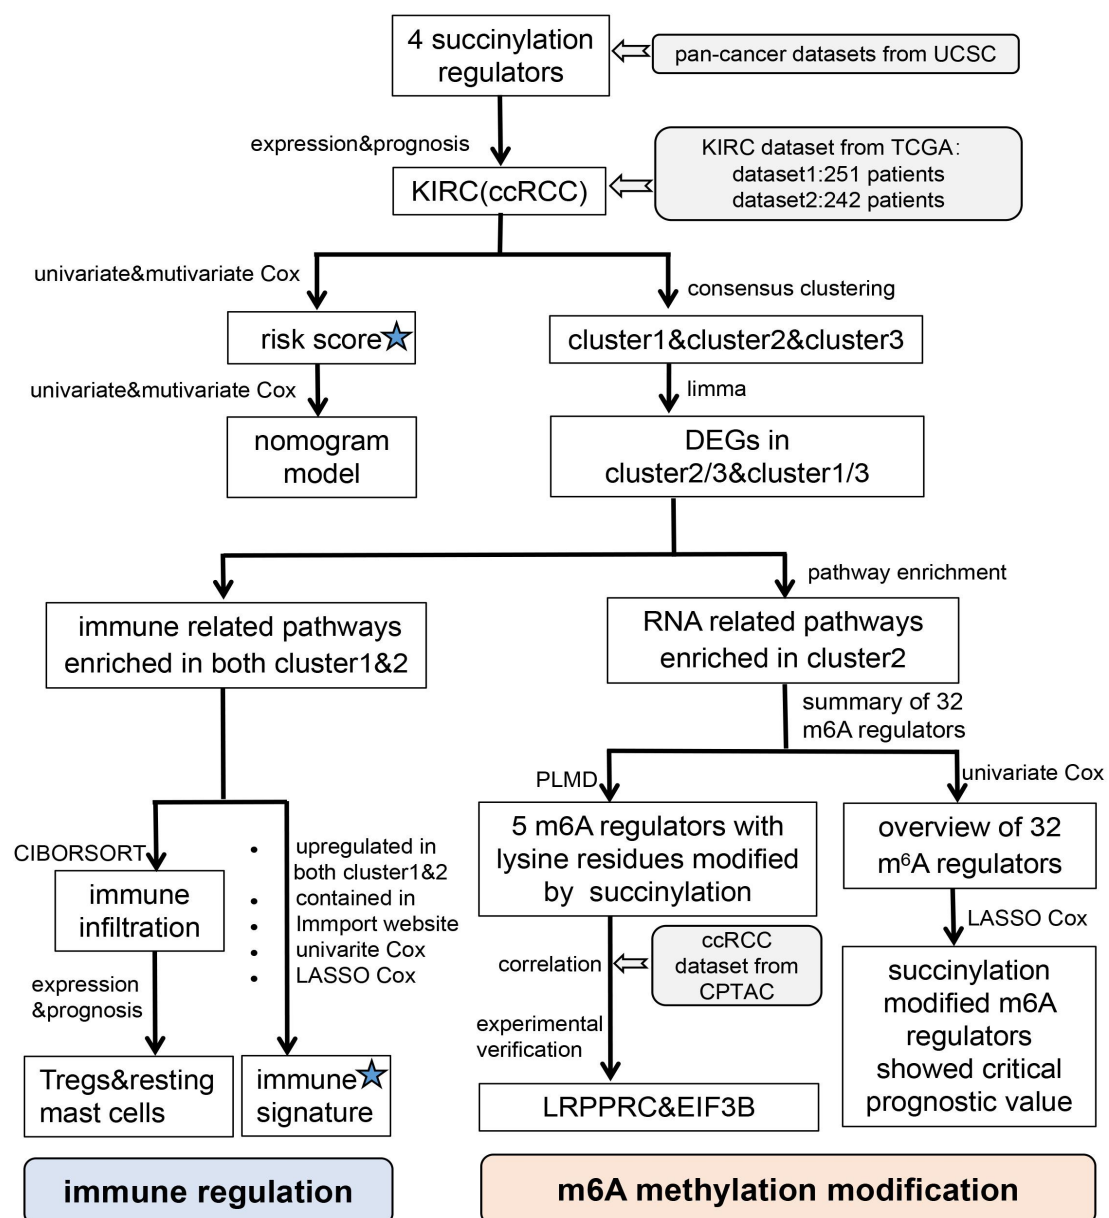

**FIGURE S2** | Comparison of clinical characteristics including between dataset 1 and dataset 2. Comparison of Gender (A), Age (B), T stage (C), M stage (D), survival status (E) and OS (F) between dataset 1 and dataset 2. OS, overall survival.

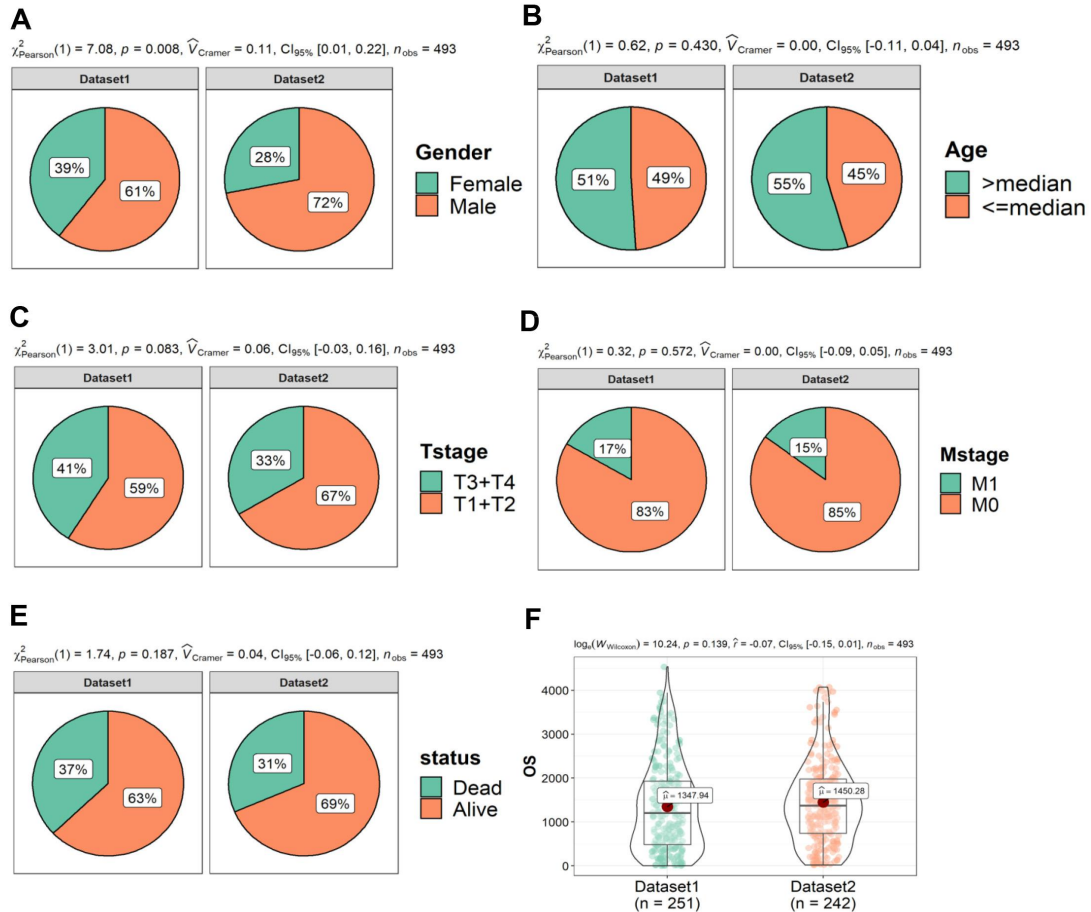

**FIGURE S3** | Validation of RS based on succinylation regulators by dataset 2. (A) Distribution of the risk score, OS, survival status, and the relative mRNA expression of CPT1A and KAT2A among ccRCC patients in dataset 2. (B) Kaplan-Meier survival curves for ccRCC patients with high and low RS in dataset 2. RS, risk score. ccRCC, clear cell renal cell carcinoma.

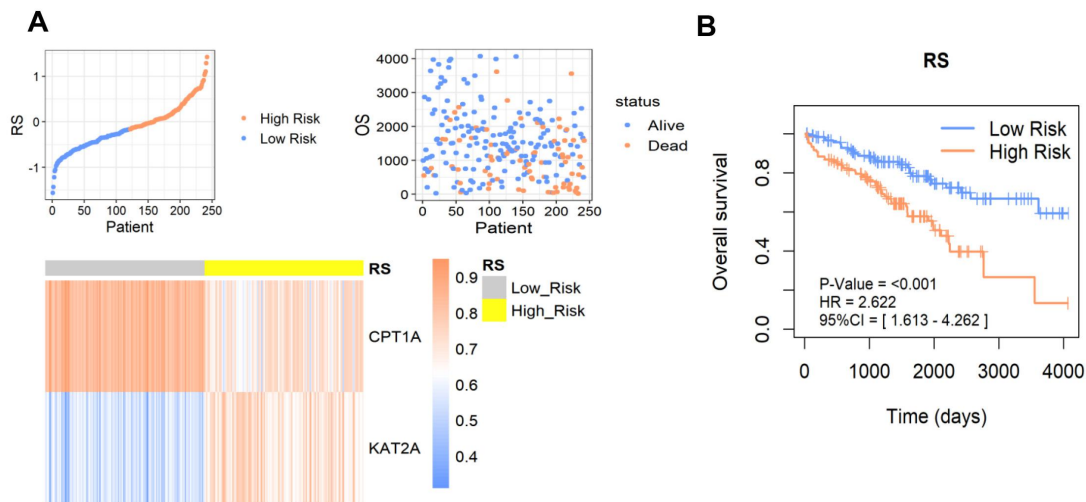

**FIGURE S4** | Validation of consensus clustering based on succinylation regulators by dataset 2. **(A)** The IGP values of three clusters in dataset 2 divided by the centroid of clusters in dataset 1. **(B)** The different expression pattern of four succinylation regulators among three clusters in dataset 2, \*\*\*\* $P < 0.0001$ . **(C)** PCA of the total mRNA expression profile in dataset 2. **(D)** Kaplan-Meier survival curve for ccRCC patients among different clusters in dataset 2. **(E)** The heatmap demonstrated the expression of four succinylation regulators in patients contained in dataset 2 as well as the association between RS and consensus clusters. PCA, principal component analysis; IGP, in-group-proportion; RS, risk score.

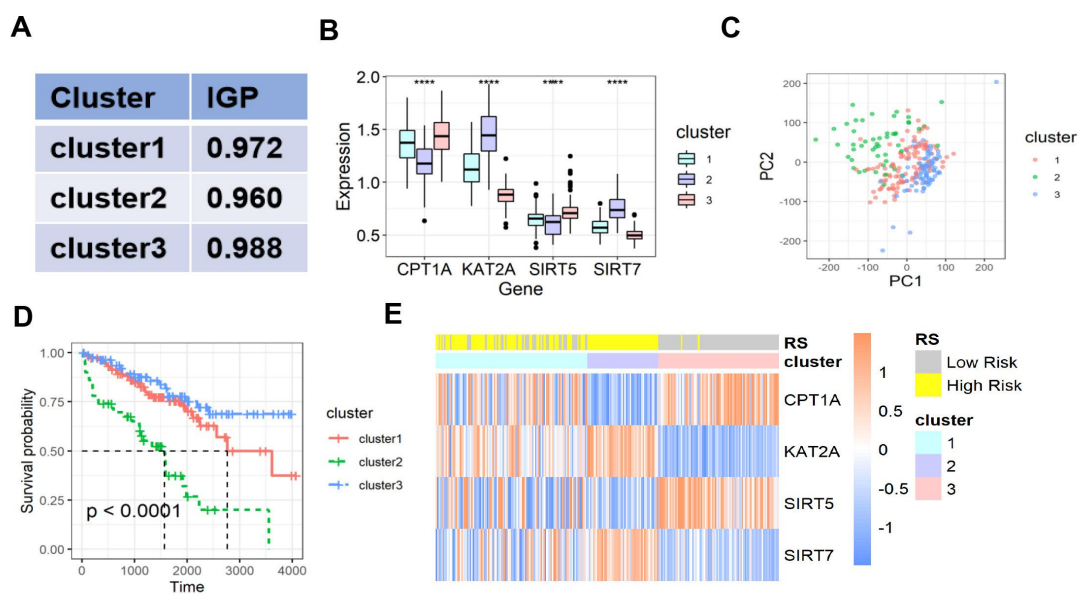

**FIGURE S5** | Validation of the immune signature by dataset 2. **(A)** Kaplan-Meier survival curves for ccRCC patients with high and low RS\_immune in dataset 2. **(B)** The ROC curves based on immune signature for 1-, 3-, 5- and 8-year survival probabilities analyzed by dataset 2. *P* value for survival curve was calculated by the log-rank test. ccRCC, clear cell renal cell carcinoma; RS, risk score; ROC, receiver operating characteristic.

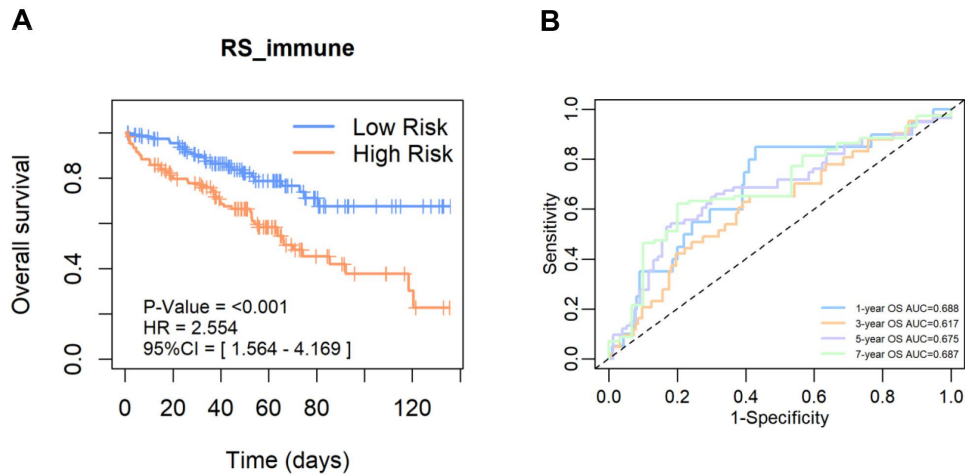

**FIGURE S6** | A brief graph summary of the potential mechanism on how succinylation modification promotes malignant progression of ccRCC. In ccRCC, four well-known succinylation regulators work together to regulate the succinylation level of their substrate proteins, among which CPT1A and SIRT5 are downregulated while KAT2A and SIRT7 are upregulated compared to the corresponding normal tissues. Succinylation modification might promote progression of ccRCC in the following manners: ① by altering the infiltration of immune cells, such as accelerating the infiltration of Tregs and decreasing the infiltration of M0 macrophages; ② by regulating the expression of m6A regulators including LRPPRC and EIF3B.

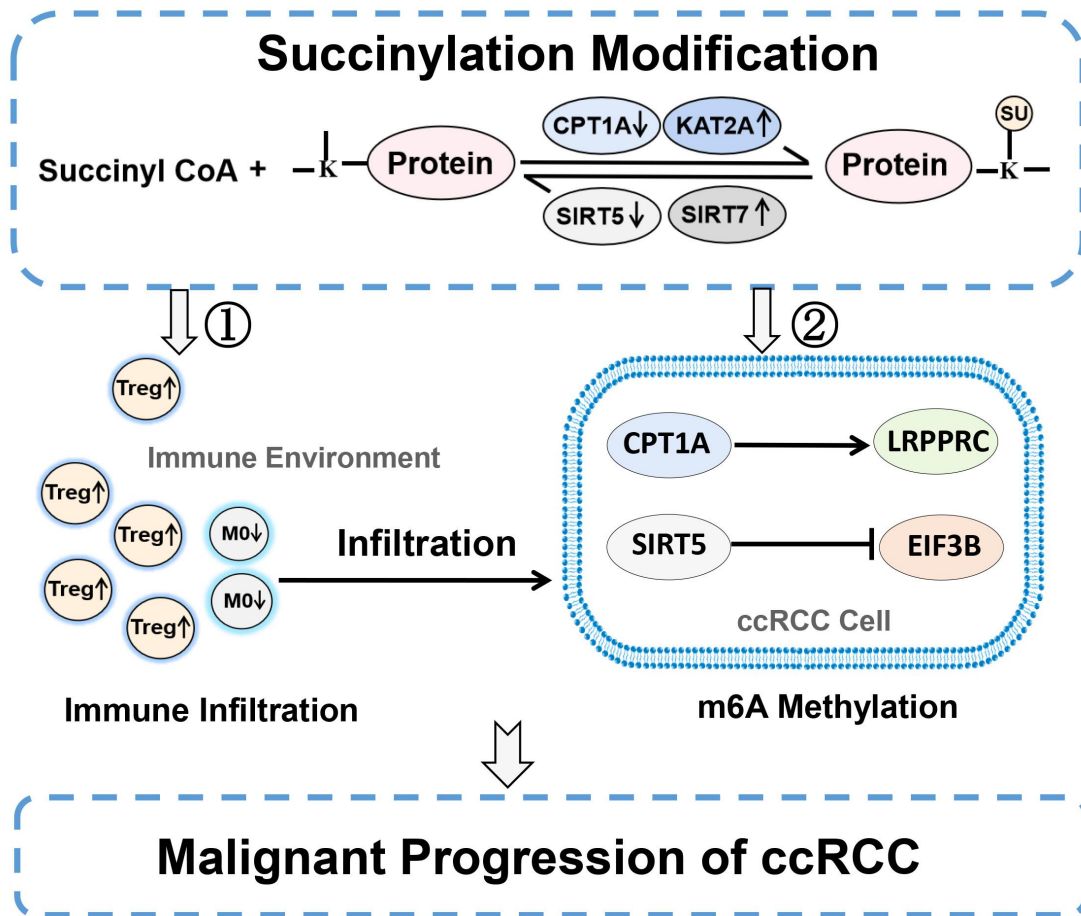

## Supplementary Tables

**TABLE S1** | Clinicopathological characteristics of 251 ccRCC patients in dataset 1.

| Parameters | Alive<br>(N=158) | Dead<br>(N=93) | Total<br>(N=251) |
|------------|------------------|----------------|------------------|
| Age        |                  |                |                  |
| <=median   | 86 (54.4%)       | 37 (39.8%)     | 123 (49.0%)      |
| >median    | 72 (45.6%)       | 56 (60.2%)     | 128 (51.0%)      |
| Gender     |                  |                |                  |
| Male       | 96 (60.8%)       | 56 (60.2%)     | 152 (60.6%)      |
| Female     | 62 (39.2%)       | 37 (39.8%)     | 99 (39.4%)       |
| T stage    |                  |                |                  |
| T1+T2      | 111 (70.3%)      | 37 (39.8%)     | 148 (59.0%)      |
| T3+T4      | 47 (29.7%)       | 56 (60.2%)     | 103 (41.0%)      |
| N stage    |                  |                |                  |
| N0         | 153 (96.8%)      | 82 (88.2%)     | 235 (93.6%)      |
| N1         | 5 (3.2%)         | 11 (11.8%)     | 16 (6.4%)        |
| M stage    |                  |                |                  |
| M0         | 148 (93.7%)      | 61 (65.6%)     | 209 (83.3%)      |
| M1         | 10 (6.3%)        | 32 (34.4%)     | 42 (16.7%)       |

The median age of ccRCC patients in dataset 1 is 62 years old.

**TABLE S2** | Clinicopathological characteristics of 242 ccRCC patients in dataset 2.

| Parameters | Alive<br>(N=166) | Dead<br>(N=76) | Total<br>(N=242) |
|------------|------------------|----------------|------------------|
| Age        |                  |                |                  |
| <=median   | 89 (53.6%)       | 21 (27.6%)     | 110 (45.5%)      |
| >median    | 77 (46.4%)       | 55 (72.4%)     | 132 (54.5%)      |
| Gender     |                  |                |                  |
| Male       | 123 (74.1%)      | 51 (67.1%)     | 174 (71.9%)      |
| Female     | 43 (25.9%)       | 25 (32.9%)     | 68 (28.1%)       |
| Tstage     |                  |                |                  |
| T1+T2      | 130 (78.3%)      | 31 (40.8%)     | 161 (66.5%)      |
| T3+T4      | 36 (21.7%)       | 45 (59.2%)     | 81 (33.5%)       |
| Mstage     |                  |                |                  |
| M0         | 161 (97.0%)      | 45 (59.2%)     | 206 (85.1%)      |
| M1         | 5 (3.0%)         | 31 (40.8%)     | 36 (14.9%)       |

The median age of ccRCC patients in dataset 2 is 60 years old.

**TABLE S3** | Clinicopathological characteristics of 42 ccRCC patients for immunohistochemistry.

| Parameters  | Total(N=42) |
|-------------|-------------|
| Age (years) |             |

|          |            |
|----------|------------|
| <=median | 23 (46.0%) |
| >median  | 27 (54.0%) |
| Gender   |            |
| Male     | 28 (56.0%) |
| Female   | 22 (44.0%) |
| Stage    |            |
| I        | 5 (10.0%)  |
| II       | 25 (50.0%) |
| III      | 15 (30.0%) |
| IV       | 5 (10.0%)  |

The median age of ccRCC patients for immunohistochemistry is 59 years old.

**TABLE S4** | The univariate Cox regression analysis between 4 succinylation regulators and OS in 10 common tumors.

| Tumor | Gene  | HR    | 95%CI       | P      |
|-------|-------|-------|-------------|--------|
| ESCA  | CPT1A | 1.043 | 0.673-1.616 | 0.851  |
|       | KAT2A | 0.710 | 0.457-1.103 | 0.128  |
|       | SIRT5 | 0.872 | 0.561-1.355 | 0.541  |
|       | SIRT7 | 0.925 | 0.593-1.443 | 0.73   |
| STAD  | CPT1A | 0.986 | 0.830-1.172 | 0.875  |
|       | KAT2A | 0.909 | 0.756-1.092 | 0.309  |
|       | SIRT5 | 0.869 | 0.668-1.131 | 0.298  |
|       | SIRT7 | 0.824 | 0.660-1.029 | 0.088  |
| LUSC  | CPT1A | 1.091 | 0.953-1.249 | 0.206  |
|       | KAT2A | 0.888 | 0.778-1.015 | 0.081  |
|       | SIRT5 | 0.930 | 0.778-1.111 | 0.422  |
|       | SIRT7 | 0.986 | 0.835-1.166 | 0.873  |
| LUAD  | CPT1A | 0.955 | 0.816-1.118 | 0.568  |
|       | KAT2A | 0.972 | 0.842-1.121 | 0.692  |
|       | SIRT5 | 1.071 | 0.840-1.365 | 0.581  |
|       | SIRT7 | 1.181 | 0.963-1.448 | 0.11   |
| LIHC  | CPT1A | 0.983 | 0.855-1.131 | 0.814  |
|       | KAT2A | 0.989 | 0.853-1.148 | 0.887  |
|       | SIRT5 | 0.955 | 0.781-1.168 | 0.657  |
|       | SIRT7 | 1.108 | 0.932-1.318 | 0.244  |
| KIRP  | CPT1A | 1.011 | 0.771-1.327 | 0.935  |
|       | KAT2A | 1.118 | 0.863-1.448 | 0.399  |
|       | SIRT5 | 0.576 | 0.365-0.910 | 0.018  |
|       | SIRT7 | 1.361 | 0.848-2.184 | 0.201  |
| KIRC  | CPT1A | 0.660 | 0.573-0.759 | <0.001 |
|       | KAT2A | 1.487 | 1.277-1.732 | <0.001 |
|       | SIRT5 | 0.633 | 0.522-0.766 | <0.001 |
|       | SIRT7 | 1.702 | 1.299-2.229 | <0.001 |

|      |       |       |             |        |
|------|-------|-------|-------------|--------|
| COAD | CPT1A | 0.981 | 0.735-1.309 | 0.897  |
|      | KAT2A | 1.009 | 0.776-1.313 | 0.947  |
|      | SIRT5 | 1.199 | 0.770-1.866 | 0.421  |
|      | SIRT7 | 0.954 | 0.646-1.408 | 0.811  |
| BRCA | CPT1A | 1.326 | 1.154-1.524 | <0.001 |
|      | KAT2A | 0.954 | 0.797-1.141 | 0.603  |
|      | SIRT5 | 1.170 | 0.921-1.486 | 0.198  |
|      | SIRT7 | 0.692 | 0.571-0.837 | <0.001 |
| BLCA | CPT1A | 1.148 | 1.024-1.287 | 0.018  |
|      | KAT2A | 0.761 | 0.617-0.940 | 0.011  |
|      | SIRT5 | 0.805 | 0.646-1.004 | 0.055  |
|      | SIRT7 | 0.743 | 0.596-0.925 | 0.008  |

---



**TABLE S5** | The correlation between the expression of four succinylation regulators and clinicopathological parameters in dataset 1.

| Parameter | Total | CPT1A |      |        | KAT2A |      |       | SIRT5 |      |       | SIRT7 |      |       |
|-----------|-------|-------|------|--------|-------|------|-------|-------|------|-------|-------|------|-------|
|           |       | Low   | High | P      | Low   | High | P     | Low   | High | P     | Low   | High | P     |
| T stage   |       |       |      | <0.001 |       |      | 0.473 |       |      | 0.004 |       |      | 0.024 |
| T1+T2     | 148   | 57    | 91   |        | 77    | 71   |       | 62    | 86   |       | 83    | 65   |       |
| T3+T4     | 103   | 68    | 35   |        | 48    | 55   |       | 63    | 40   |       | 42    | 61   |       |
| N stage   |       |       |      | 0.068  |       |      | 0.809 |       |      | 0.429 |       |      | 0.202 |
| N0        | 235   | 113   | 122  |        | 118   | 117  |       | 115   | 120  |       | 120   | 115  |       |
| N1        | 16    | 12    | 4    |        | 7     | 9    |       | 10    | 6    |       | 5     | 11   |       |
| M stage   |       |       |      | 0.026  |       |      | 0.135 |       |      | 0.010 |       |      | 0.004 |
| M0        | 209   | 97    | 112  |        | 109   | 100  |       | 96    | 113  |       | 113   | 96   |       |
| M1        | 42    | 28    | 14   |        | 16    | 26   |       | 29    | 13   |       | 12    | 30   |       |
| Age       |       |       |      | 0.951  |       |      | 0.951 |       |      | 0.487 |       |      | 0.658 |
| <median   | 123   | 62    | 61   |        | 62    | 61   |       | 58    | 65   |       | 59    | 64   |       |
| >=median  | 128   | 63    | 65   |        | 63    | 65   |       | 67    | 61   |       | 66    | 62   |       |
| Gender    |       |       |      | <0.001 |       |      | 0.326 |       |      | 0.959 |       |      | 0.278 |
| female    | 99    | 35    | 64   |        | 45    | 54   |       | 50    | 49   |       | 54    | 45   |       |
| male      | 152   | 90    | 62   |        | 80    | 72   |       | 75    | 77   |       | 71    | 81   |       |

The median age of ccRCC patients in dataset 1 is 62 years old.
